# Supplementary material for: Pain-coping scale for children and their parents: a cross-sectional study in children with musculoskeletal pain
Source: PubMed Central journal article supplement (PMC9875488; doi:10.1186/s12969-023-00791-1), 2023-01-25
Supplement: 12969_2023_791_MOESM1_ESM.pdf [file 12969_2023_791_MOESM1_ESM.pdf]

**Additional file 1. Stress questionnaire.**

Stress refers to a situation where a person is faced with so many challenges or demands on him/herself that his/her available resources are stretched out or exceeded. A stressed-out person may be nervous or irritated about not being able to control things or his/her own life.

|                                                                           | Never | Rarely | Sometimes | Often | Very often |
|---------------------------------------------------------------------------|-------|--------|-----------|-------|------------|
| In the past month, how often have you felt this way due to the disease?   | 1     | 2      | 3         | 4     | 5          |
| In the past month, how often have you felt this way due to other reasons? | 1     | 2      | 3         | 4     | 5          |
